# Supplementary material
Source: PubMed Central journal article supplement (PMC3502996)
Supplement: JCM.00990-12_zjm999092107so1.pdf [file JCM.00990-12_zjm999092107so1.pdf]

reference strains carrying *bla*<sub>KPC</sub> (KPC-2). The numbers represent the mismatch to perfect-match ratios (MM/PM), a measure for the discriminative power of each probe set. The figures represent data of the following reference strains: (A) *K. pneumoniae* (VA184), (B) *K. pneumoniae* (VIN), (C) *E. coli* (RKI), (D) *K. pneumoniae* (VA406), (E) *K. pneumoniae* (GOU), (F) *K. pneumoniae* (VA361), (G) *K. pneumoniae* (AUB). In all cases variant KPC-2 was identified correctly.
