# Supplementary material
Source: PubMed Central journal article supplement (PMC3502996)
Supplement: JCM.00990-12_zjm999092107so2.pdf [file JCM.00990-12_zjm999092107so2.pdf]

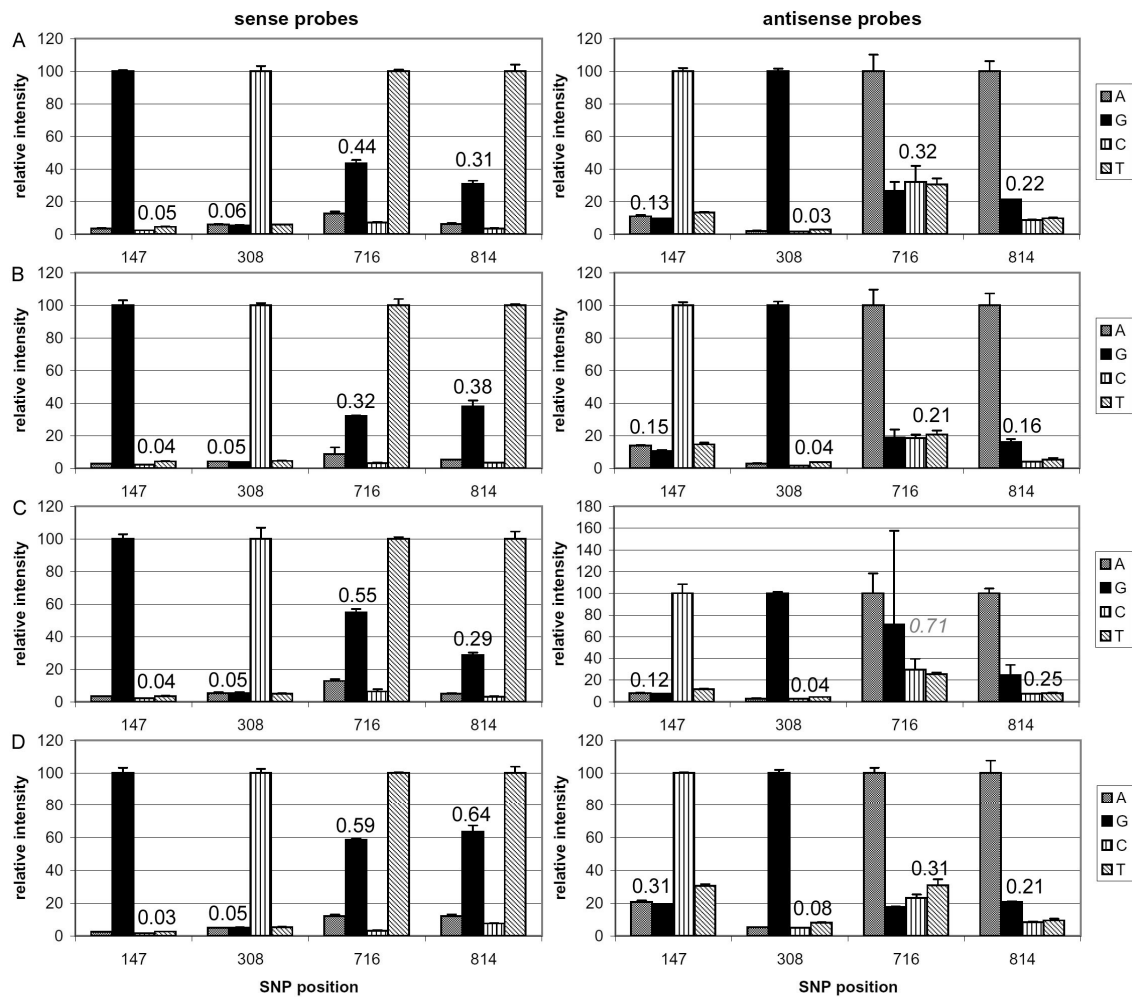

**Figure S2:** Relative fluorescent signal intensities of sense and antisense probes obtained after quantification of DNA microarrays, which were hybridized with DNA from different reference strains carrying *bla<sub>KPC</sub>* (KPC-3). The numbers represent the mismatch to perfect-match ratios (MM/PM), a measure for the discriminative power of each probe set. The MM/PM ratio was below the threshold of 0.7 in all cases with one exception (C, antisense probe set SNP716, most likely resulting from a high standard deviation). Therefore the sense probes were used for discrimination. The figures represent data of the following reference strains: (A) *K. pneumoniae* (VA367), (B) *K. pneumoniae* (RKI), *K. pneumoniae* (VA375), *K. pneumoniae* (RKI). In all cases variant KPC-3 was identified correctly.
