# Supplementary material
Source: PubMed Central journal article supplement (PMC3502996)
Supplement: JCM.00990-12_zjm999092107so5.pdf [file JCM.00990-12_zjm999092107so5.pdf]

|                              |                                      |                  |       | cells/ml urine (counted) |       |       |                        |                        |                         |                          |                   |                   |                   |                   |       |  |  |
|------------------------------|--------------------------------------|------------------|-------|--------------------------|-------|-------|------------------------|------------------------|-------------------------|--------------------------|-------------------|-------------------|-------------------|-------------------|-------|--|--|
|                              |                                      |                  |       | NTC                      | 0     | 0     | 4x10 <sup>6</sup> (30) | 4x10 <sup>4</sup> (80) | 4x10 <sup>2</sup> (360) | 4x10 <sup>3</sup> (4000) | 4x10 <sup>4</sup> | 4x10 <sup>5</sup> | 4x10 <sup>6</sup> | 4x10 <sup>7</sup> |       |  |  |
|                              |                                      |                  |       | Array                    | 12    | 10    | 9                      | 8                      | 7                       | 6                        | 5                 | 4                 | 3                 | 2                 | 1     |  |  |
|                              |                                      |                  |       | SNP                      |       |       |                        |                        |                         |                          |                   |                   |                   |                   |       |  |  |
| Klebsiella pneumoniae, KPC-3 | Qiagen 1                             | MM/PM            | Sense | 814                      | 0.971 | 0.936 | 0.719                  | 0.951                  | 0.997                   | 0.457                    | 0.554             | 0.423             | 0.334             | 0.482             | 0.430 |  |  |
|                              |                                      |                  | 716   | 0.741                    | 0.843 | 0.242 | 0.805                  | 0.837                  | 0.869                   | 0.675                    | 0.452             | 0.363             | 0.346             | 0.354             |       |  |  |
|                              |                                      |                  | 308   | 0.612                    | 0.289 | 0.976 | 0.945                  | 0.809                  | 0.893                   | 0.736                    | 0.150             | 0.096             | 0.083             | 0.088             |       |  |  |
|                              |                                      | 147              | 0.374 | 0.596                    | 0.513 | 0.716 | 0.884                  | 0.438                  | 0.237                   | 0.120                    | 0.044             | 0.050             | 0.047             |                   |       |  |  |
|                              |                                      | Anti-Sense       | 814   | 0.610                    | 0.696 | 0.885 | 0.886                  | 0.933                  | 0.631                   | 0.738                    | 0.177             | 0.143             | 0.148             | 0.208             |       |  |  |
|                              |                                      | 716              | 0.928 | 0.841                    | 0.682 | 0.849 | 0.919                  | 0.974                  | 0.737                   | 0.697                    | 0.478             | 0.394             | 0.446             |                   |       |  |  |
|                              | 308                                  | 0.416            | 0.555 | 0.560                    | 0.898 | 0.932 | 0.350                  | 0.094                  | 0.073                   | 0.066                    | 0.045             | 0.076             |                   |                   |       |  |  |
|                              | 147                                  | 0.518            | 0.600 | 0.875                    | 1.000 | 0.867 | 0.619                  | 0.248                  | 0.126                   | 0.134                    | 0.250             | 0.243             |                   |                   |       |  |  |
|                              | average absolute PM signal intensity | Sense            | 814   | 135                      | 122   | 260   | 140                    | 126                    | 232                     | 1454                     | 2844              | 2599              | 5786              | 5456              | 156.9 |  |  |
|                              | 716                                  | 141              | 102   | 385                      | 137   | 98    | 103                    | 243                    | 511                     | 1384                     | 2145              | 2544              | 154.4             |                   |       |  |  |
|                              | 308                                  | 147              | 341   | 98                       | 110   | 100   | 117                    | 230                    | 809                     | 4302                     | 3384              | 3180              | 162.3             |                   |       |  |  |
|                              | 147                                  | 307              | 300   | 177                      | 181   | 165   | 245                    | 456                    | 1202                    | 2786                     | 2641              | 1889              | 411.6             |                   |       |  |  |
| Anti-Sense                   | 814                                  | 145              | 124   | 118                      | 119   | 103   | 107                    | 174                    | 593                     | 2719                     | 2121              | 1421              | 163.0             |                   |       |  |  |
| 716                          | 69                                   | 82               | 87    | 94                       | 85    | 57    | 85                     | 104                    | 121                     | 195                      | 487               | 88.2              |                   |                   |       |  |  |
| 308                          | 323                                  | 188              | 175   | 134                      | 143   | 302   | 1390                   | 2424                   | 1804                    | 4422                     | 5038              | 420.7             |                   |                   |       |  |  |
| 147                          | 411                                  | 245              | 156   | 151                      | 189   | 230   | 640                    | 6480                   | 9793                    | 12654                    | 15420             | 487.5             |                   |                   |       |  |  |
| Variant Identified           | Sense                                |                  |       |                          |       |       |                        |                        |                         | KPC-3                    | KPC-3             | KPC-3             | KPC-3             |                   |       |  |  |
| Anti-Sense                   |                                      |                  |       |                          |       |       |                        |                        |                         | KPC-3                    | KPC-3             | KPC-3             | KPC-8             |                   |       |  |  |
| Result                       | Variant Identified                   | Sense+Anti-Sense |       |                          |       |       |                        |                        |                         | KPC-3                    | KPC-3             | KPC-3             | KPC-3             | ←---              |       |  |  |
| CV (if SD > 30% of PM)       |                                      |                  |       | Sense                    | 814   |       | 47.63                  | 64.59                  |                         |                          | 127.16            |                   |                   |                   |       |  |  |
|                              |                                      |                  |       | 716                      |       |       | 147.85                 |                        |                         | 38.26                    |                   |                   |                   |                   |       |  |  |
|                              |                                      |                  |       | 308                      |       |       |                        |                        |                         |                          |                   |                   |                   |                   |       |  |  |
|                              |                                      |                  |       | 147                      |       | 43.54 |                        |                        |                         |                          |                   |                   |                   |                   |       |  |  |
|                              |                                      |                  |       | Anti-Sense               | 814   |       |                        | 46.53                  | 37.11                   |                          |                   |                   |                   |                   |       |  |  |
|                              |                                      |                  |       | 716                      |       |       | 41.81                  |                        |                         |                          |                   |                   |                   | 146.89            |       |  |  |
|                              |                                      |                  |       | 308                      |       |       |                        |                        |                         |                          |                   |                   |                   |                   |       |  |  |
|                              |                                      |                  |       | 147                      |       |       |                        |                        |                         |                          |                   |                   |                   |                   |       |  |  |

|                              |                                      |                  |       |            |       |       |       |        |        |       |       |       |       |       |       |  |
|------------------------------|--------------------------------------|------------------|-------|------------|-------|-------|-------|--------|--------|-------|-------|-------|-------|-------|-------|--|
| Klebsiella pneumoniae, KPC-3 | Qiagen 2                             | MM/PM            | Sense | 814        | 0.849 | 0.967 | 0.692 | 0.973  | 0.490  | 0.455 | 0.412 | 0.527 | 0.537 | 0.476 | 0.497 |  |
|                              |                                      |                  | 716   | 0.404      | 0.795 | 0.829 | 0.868 | 0.949  | 0.530  | 0.052 | 0.302 | 0.256 | 0.220 | 0.252 |       |  |
|                              |                                      |                  | 308   | 0.854      | 0.527 | 0.731 | 0.916 | 0.289  | 0.195  | 0.067 | 0.088 | 0.062 | 0.166 | 0.157 |       |  |
|                              |                                      | 147              | 0.843 | 0.658      | 0.549 | 0.796 | 0.106 | 0.110  | 0.026  | 0.020 | 0.028 | 0.031 | 0.033 |       |       |  |
|                              |                                      | Anti-Sense       | 814   | 0.611      | 0.628 | 0.783 | 0.308 | 0.264  | 0.261  | 0.161 | 0.159 | 0.127 | 0.158 | 0.192 |       |  |
|                              |                                      | 716              | 0.518 | 0.741      | 0.218 | 0.454 | 0.687 | 0.842  | 0.317  | 0.351 | 0.256 | 0.251 | 0.293 |       |       |  |
|                              | 308                                  | 0.580            | 0.827 | 0.892      | 0.996 | 0.087 | 0.054 | 0.030  | 0.036  | 0.037 | 0.063 | 0.040 |       |       |       |  |
|                              | 147                                  | 0.875            | 0.950 | 0.710      | 0.929 | 0.161 | 0.171 | 0.151  | 0.156  | 0.216 | 0.173 | 0.169 |       |       |       |  |
|                              | average absolute PM signal intensity | Sense            | 814   | 116        | 32    | 88    | 23    | 419    | 837    | 5454  | 10462 | 14141 | 6874  | 3897  | 185.2 |  |
|                              | 716                                  | 194              | 27    | 49         | 24    | 86    | 158   | 797    | 3285   | 3520  | 2378  | 1542  | 253.2 |       |       |  |
|                              | 308                                  | 195              | 32    | 49         | 22    | 217   | 360   | 1124   | 6670   | 6944  | 2617  | 3232  | 230.5 |       |       |  |
|                              | 147                                  | 218              | 92    | 79         | 85    | 667   | 936   | 2252   | 4402   | 4732  | 1802  | 2135  | 365.3 |       |       |  |
| Anti-Sense                   | 814                                  | 20               | 69    | 12         | 46    | 290   | 265   | 686    | 2800   | 2608  | 877   | 925   | 28.3  |       |       |  |
| 716                          | 50                                   | 24               | 54    | 23         | 12    | 18    | 31    | 136    | 173    | 45    | 39    | 97.8  |       |       |       |  |
| 308                          | 220                                  | 89               | 100   | 30         | 690   | 1291  | 6353  | 10419  | 13455  | 6428  | 3151  | 285.5 |       |       |       |  |
| 147                          | 263                                  | 83               | 145   | 37         | 399   | 667   | 8655  | 21847  | 28367  | 19419 | 11187 | 493.6 |       |       |       |  |
| Variant Identified           | Sense                                |                  |       |            |       |       |       |        |        | KPC-3 | KPC-3 | KPC-3 | KPC-3 |       |       |  |
| Anti-Sense                   |                                      |                  |       |            |       |       |       |        |        | KPC-3 | KPC-3 |       |       |       |       |  |
| Result                       | Variant Identified                   | Sense+Anti-Sense |       |            |       |       |       |        |        | KPC-3 | KPC-3 | KPC-3 | KPC-3 | ←---  |       |  |
| CV (if SD > 30% of PM)       |                                      |                  |       | Sense      | 814   |       |       | 72.26  |        |       |       |       |       |       |       |  |
|                              |                                      |                  |       | 716        |       |       |       |        |        |       |       |       |       |       |       |  |
|                              |                                      |                  |       | 308        |       |       |       |        |        |       |       |       |       |       |       |  |
|                              |                                      |                  |       | 147        |       | 32.09 |       | 128.91 |        |       |       |       |       |       |       |  |
|                              |                                      |                  |       | Anti-Sense | 814   |       |       | 60.30  | 141.79 | 44.11 |       |       |       |       |       |  |
|                              |                                      |                  |       | 716        | 31.77 |       | 75.41 | 105.42 | 48.79  |       |       |       |       |       |       |  |
|                              |                                      |                  |       | 308        |       |       | 47.89 |        |        |       |       |       |       |       |       |  |
|                              |                                      |                  |       | 147        | 48.71 |       |       | 68.60  |        |       |       |       |       |       |       |  |

|                              |                                      |                  |       |            |       |       |       |       |       |       |       |       |       |       |       |  |
|------------------------------|--------------------------------------|------------------|-------|------------|-------|-------|-------|-------|-------|-------|-------|-------|-------|-------|-------|--|
| Klebsiella pneumoniae, KPC-3 | Norgen 1                             | MM/PM            | Sense | 814        | 0.254 | 0.607 | 0.593 | 0.538 | 0.250 | 0.339 | 0.393 | 0.281 | 0.381 | 0.396 | 0.733 |  |
|                              |                                      |                  | 716   | 0.607      | 0.799 | 0.954 | 0.228 | 0.596 | 0.400 | 0.349 | 0.192 | 0.256 | 0.150 | 0.222 |       |  |
|                              |                                      |                  | 308   | 0.258      | 0.373 | 0.645 | 0.818 | 0.286 | 0.153 | 0.069 | 0.047 | 0.053 | 0.043 | 0.046 |       |  |
|                              |                                      | 147              | 0.415 | 0.354      | 0.423 | 0.620 | 0.178 | 0.061 | 0.072 | 0.022 | 0.022 | 0.017 | 0.025 |       |       |  |
|                              |                                      | Anti-Sense       | 814   | 0.558      | 0.726 | 0.606 | 0.752 | 0.400 | 0.194 | 0.211 | 0.116 | 0.122 | 0.127 | 0.221 |       |  |
|                              |                                      | 716              | 0.826 | 0.961      | 0.778 | 0.783 | 0.932 | 0.805 | 0.492 | 0.128 | 0.101 | 0.363 | 0.721 |       |       |  |
|                              | 308                                  | 0.058            | 0.090 | 0.133      | 0.438 | 0.054 | 0.030 | 0.050 | 0.017 | 0.022 | 0.022 | 0.041 |       |       |       |  |
|                              | 147                                  | 0.422            | 0.423 | 0.627      | 0.991 | 0.207 | 0.145 | 0.162 | 0.106 | 0.239 | 0.216 | 0.254 |       |       |       |  |
|                              | average absolute PM signal intensity | Sense            | 814   | 463        | 127   | 100   | 129   | 589   | 1690  | 2352  | 5395  | 11487 | 16490 | 7092  | 535.6 |  |
|                              | 716                                  | 65               | 35    | 32         | 200   | 77    | 232   | 689   | 976   | 2833  | 3940  | 3096  | 76.4  |       |       |  |
|                              | 308                                  | 95               | 60    | 55         | 64    | 136   | 392   | 1605  | 4266  | 4238  | 4846  | 3385  | 118.4 |       |       |  |
|                              | 147                                  | 109              | 123   | 160        | 127   | 323   | 1248  | 1426  | 2924  | 2506  | 1577  | 2041  | 114.9 |       |       |  |
| Anti-Sense                   | 814                                  | 44               | 35    | 59         | 69    | 72    | 259   | 646   | 2394  | 2129  | 545   | 483   | 61.8  |       |       |  |
| 716                          | 22                                   | 18               | 27    | 39         | 29    | 37    | 82    | 123   | 340   | 78    | 65    | 30.1  |       |       |       |  |
| 308                          | 682                                  | 362              | 307   | 133        | 919   | 2719  | 2379  | 5509  | 12417 | 5501  | 3262  | 891.9 |       |       |       |  |
| 147                          | 111                                  | 94               | 96    | 94         | 385   | 1438  | 5414  | 10892 | 25334 | 20637 | 24427 | 154.7 |       |       |       |  |
| Variant Identified           | Sense                                |                  |       |            |       |       | KPC-3 | KPC-3 | KPC-3 | KPC-3 | KPC-3 | KPC-3 |       |       |       |  |
| Anti-Sense                   |                                      |                  |       |            |       |       | KPC-3 | KPC-3 | KPC-3 | KPC-3 | KPC-3 |       |       |       |       |  |
| Result                       | Variant Identified                   | Sense+Anti-Sense |       |            |       |       | KPC-3 | KPC-3 | KPC-3 | KPC-3 | KPC-3 | KPC-3 | ←---  |       |       |  |
| CV (if SD > 30% of PM)       |                                      |                  |       | Sense      | 814   |       |       |       |       |       |       |       |       | 44.44 |       |  |
|                              |                                      |                  |       | 716        |       |       |       | 92.67 |       |       |       |       |       |       |       |  |
|                              |                                      |                  |       | 308        |       |       |       |       |       |       |       |       |       |       |       |  |
|                              |                                      |                  |       | 147        |       |       |       |       |       |       |       |       |       |       |       |  |
|                              |                                      |                  |       | Anti-Sense | 814   |       |       | 56.12 |       |       |       |       |       | 55.53 |       |  |
|                              |                                      |                  |       | 716        |       |       |       |       |       |       |       |       |       |       |       |  |
|                              |                                      |                  |       | 308        |       |       |       |       |       |       |       |       |       |       |       |  |
|                              |                                      |                  |       | 147        |       |       |       |       |       |       |       |       |       |       |       |  |

|                              |                                      |            |       |       |       |       |       |       |       |       |       |       |       |       |       |  |
|------------------------------|--------------------------------------|------------|-------|-------|-------|-------|-------|-------|-------|-------|-------|-------|-------|-------|-------|--|
| Klebsiella pneumoniae, KPC-3 | Norgen 2                             | MM/PM      | Sense | 814   | 0.431 | 0.892 | 0.712 | 0.545 | 0.407 | 0.400 | 0.394 | 0.358 | 0.408 | 0.390 | 0.412 |  |
|                              |                                      |            | 716   | 0.789 | 0.746 | 0.920 | 0.877 | 0.794 | 0.458 | 0.372 | 0.353 | 0.315 | 0.389 | 0.339 |       |  |
|                              |                                      |            | 308   | 0.930 | 0.996 | 0.891 | 0.585 | 0.359 | 0.103 | 0.086 | 0.065 | 0.060 | 0.063 | 0.074 |       |  |
|                              |                                      | 147        | 0.491 | 0.548 | 0.489 | 0.304 | 0.152 | 0.052 | 0.071 | 0.030 | 0.036 | 0.070 | 0.110 |       |       |  |
|                              |                                      | Anti-Sense | 814   | 0.551 | 0.699 | 0.887 | 0.545 | 0.379 | 0.190 | 0.156 | 0.160 | 0.144 | 0.238 | 0.287 |       |  |
|                              |                                      | 716        | 0.984 | 0.914 | 0.940 | 0.968 | 0.934 | 0.834 | 0.428 | 0.367 | 0.426 | 0.655 | 0.865 |       |       |  |
|                              | 308                                  | 0.708      | 0.902 | 0.757 | 0.325 | 0.104 | 0.035 | 0.034 | 0.037 | 0.036 | 0.040 | 0.034 |       |       |       |  |
|                              | 147                                  | 0.752      | 0.823 | 0.995 | 0.647 | 0.354 | 0.118 | 0.136 | 0.138 | 0.179 | 0.178 | 0.175 |       |       |       |  |
|                              | average absolute PM signal intensity | Sense      | 814   | 24    | 36    | 43    | 48    | 148   | 1243  | 4826  | 4044  | 7456  | 14859 | 7207  | 27.2  |  |
|                              | 716                                  | 21         | 31    | 52    | 22    | 36    | 168   | 755   | 921   | 1236  | 2561  | 1148  | 37.7  |       |       |  |
|                              | 308                                  | 18         | 15    | 40    | 31    | 65    | 349   | 1292  | 2543  | 1155  | 603   | 708   | 23.6  |       |       |  |
|                              | 147                                  | 38         | 34    | 37    | 99    | 229   | 864   | 1730  | 1862  | 1102  | 672   | 500   | 54.5  |       |       |  |
| Anti-Sense                   | 814                                  | 24         | 1     |       |       |       |       |       |       |       |       |       |       |       |       |  |

**Figure S5: Identification of variant KPC-3 (in *K. pneumoniae*) from spiked urine samples.** Overview on array data obtained after DNA extraction from spiked urine samples (10 dilution steps + no template control (NTC)) followed by hybridization. Listed are the average absolute perfect match (PM) signal intensities for every SNP position of sense and anti-sense probes. In addition the corresponding  $MM_{\max}/PM$  ratios are presented for every SNP position. Once the threshold is reached ( $MM_{\max}/PM > 0.7$ ) the probes are not used for discrimination anymore (marked in dark grey. The same applies for the average absolute PM signal. Once the signal intensity is below the LOD, the probe set is not used for discrimination anymore, also shown in dark grey. Furthermore the standard deviation (SD) is monitored and a probe set is flagged once the SD is larger than 30% of the PM signal, shown in light grey. The probe sets which fulfil all criteria are then used for discrimination and the identified variant is shown at the bottom of the table . This is shown for extractions carried out with Qiagen and Norgen in duplicates. In all cases variant KPC-2 was correctly identified to a concentration of 4000 cells / ml urine (Qiagen) and 80 cells / ml urine (Norgen). A summary of the final results is shown in Figure 4.
